# Supplementary material
Source: PubMed Central journal article supplement (PMC5856084)
Supplement: kww143dimitrakopoulouwebmaterialfinal.pdf [file kww143dimitrakopoulouwebmaterialfinal.pdf]

## Web Material

Web Table 1. Baseline Characteristics of Prostate Cancer Cases and Controls by Cohort in the BPC3 (Mean (SD) or Geometric Mean (95% CI)).

|                        | ATBC <sup>1</sup>   |                     | EPIC <sup>2</sup>   |                     | HPFS <sup>3</sup>   |                     | PHS <sup>4</sup>    |                     | PLCO <sup>5</sup>   |                     |
|------------------------|---------------------|---------------------|---------------------|---------------------|---------------------|---------------------|---------------------|---------------------|---------------------|---------------------|
|                        | Cases               | Controls            |
| No. of participants    | 739                 | 436                 | 525                 | 458                 | 1,280               | 1,188               | 515                 | 246                 | 752                 | 652                 |
| No. of dead cases      | 217                 |                     | 79                  |                     | 82                  |                     | 93                  |                     | 40                  |                     |
| Age at blood draw      | 64.4 (5.2)          | 64.7 (5.0)          | 61.1 (6.3)          | 61.2 (6.3)          | 64.0 (7.8)          | 63.9 (7.8)          | 59.3 (7.5)          | 60.9 (7.7)          | 64.6 (5.0)          | 64.3 (5.0)          |
| Age at diagnosis       | 69.7 (5.6)          | NA                  | 65.3 (6.2)          | NA                  | 69.6 (7.5)          | NA                  | 68.4 (6.8)          | NA                  | 68.0 (5.3)          | NA                  |
| BMI, kg/m <sup>2</sup> | 26.2 (3.4)          | 26.3 (3.4)          | 26.8 (3.3)          | 27.1 (3.5)          | 26.7 (3.3)          | 25.9 (3.6)          | 24.7 (2.5)          | 24.5 (2.6)          | 27. (3.6)           | 27.5 (3.9)          |
| 25(OH)D, ng/mL         | 14.1<br>(13.5-14.7) | 16.4<br>(15.6-17.2) | 21.5<br>(20.8-22.3) | 20.9<br>(20.0-21.7) | 27.2<br>(26.5-27.9) | 26.9<br>(26.1-27.7) | 29.8<br>(28.9-30.8) | 27.4<br>(26.0-28.8) | 22.2<br>(21.7-22.8) | 21.6<br>(21.0-22.2) |
| Study duration         | 1985 – 2002         |                     | 1992 – 2004         |                     | 1993 – 2004         |                     | 1982 – 2002         |                     | 1993 - 2002         |                     |

Abbreviations: 25(OH)D, 25-hydroxyvitamin D; BMI, body mass index; BPC3, Breast and Prostate Cancer Cohort Consortium; CI, confidence interval; SD, standard deviation.

Web Table 2. Per Allele Association Between 46 GWAS-identified SNPs and Risk of Total Prostate Cancer in the BPC3.

| SNP        | Chromosome (gene)        | Number of cases | Number of controls | Minor allele frequency<br>(in controls) | Per allele<br>OR <sup>a</sup> | 95% CI     | P-value                |
|------------|--------------------------|-----------------|--------------------|-----------------------------------------|-------------------------------|------------|------------------------|
| rs13385191 | 2 ( <i>C2orf43</i> )     | 3,377           | 2,556              | 0.24 (G)                                | 1.08                          | 0.99, 1.17 | 0.09                   |
| rs1465618  | 2 ( <i>THADA</i> )       | 3,648           | 2,816              | 0.21 (T)                                | 1.11                          | 1.02, 1.21 | 0.01                   |
| rs721048   | 2 ( <i>EHBPI</i> )       | 3,675           | 2,849              | 0.17 (A)                                | 1.16                          | 1.06, 1.26 | 0.001                  |
| rs10187424 | 2 ( <i>GGCX/VAMP8</i> )  | 2,252           | 1,782              | 0.42 (G)                                | 1.06                          | 0.97, 1.16 | 0.21                   |
| rs12621278 | 2 ( <i>ITGA6</i> )       | 3,682           | 2,834              | 0.05 (G)                                | 1.08                          | 0.92, 1.26 | 0.37                   |
| rs2292884  | 2 ( <i>MLPH</i> )        | 3,109           | 2,455              | 0.24 (G)                                | 1.04                          | 0.95, 1.13 | 0.41                   |
| rs2660753  | 3 (Unknown)              | 3,692           | 2,884              | 0.11 (T)                                | 1.13                          | 1.02, 1.26 | 0.03                   |
| rs7629490  | 3 (Unknown)              | 3,115           | 2,441              | 0.33 (T)                                | 1.09                          | 1.01, 1.18 | 0.02                   |
| rs6763931  | 3 ( <i>ZBTB38</i> )      | 2,318           | 1,837              | 0.43 (T)                                | 1.03                          | 0.94, 1.12 | 0.56                   |
| rs10936632 | 3 ( <i>CLDN11/SKIL</i> ) | 2,348           | 1,858              | 0.50 (C)                                | 1.03                          | 0.94, 1.12 | 0.49                   |
| rs17021918 | 4 ( <i>PDLIM5</i> )      | 3,656           | 2,831              | 0.34 (T)                                | 1.09                          | 1.01, 1.17 | 0.02                   |
| rs7679673  | 4 ( <i>TET2</i> )        | 3,677           | 2,824              | 0.42 (A)                                | 1.14                          | 1.07, 1.23 | 1.62·10 <sup>-04</sup> |
| rs2242652  | 5 ( <i>TERT</i> )        | 2,350           | 1,858              | 0.21 (A)                                | 1.25                          | 1.12, 1.40 | 5.01·10 <sup>-05</sup> |
| rs12653946 | 5 ( <i>IRX4</i> )        | 3,365           | 2,548              | 0.44 (T)                                | 1.05                          | 0.97, 1.13 | 0.21                   |
| rs2121875  | 5 ( <i>FGF10</i> )       | 2,285           | 1,739              | 0.33 (G)                                | 1.02                          | 0.93, 1.13 | 0.63                   |
| rs130067   | 6 ( <i>CCHCR1</i> )      | 2,340           | 1,856              | 0.19 (G)                                | 1.07                          | 0.96, 1.19 | 0.24                   |
| rs339331   | 6 ( <i>RFX6</i> )        | 3,387           | 2,564              | 0.28 (C)                                | 1.05                          | 0.96, 1.13 | 0.27                   |
| rs9364554  | 6 ( <i>SLC22A3</i> )     | 3,694           | 2,876              | 0.27 (T)                                | 1.07                          | 0.99, 1.15 | 0.11                   |
| rs12155172 | 7 ( <i>SP8</i> )         | 3,650           | 2,830              | 0.23 (A)                                | 1.04                          | 0.96, 1.13 | 0.31                   |
| rs10486567 | 7 ( <i>JAZF1</i> )       | 3,677           | 2,873              | 0.24 (A)                                | 1.18                          | 1.08, 1.28 | 1.07·10 <sup>-04</sup> |
| rs6465657  | 7 ( <i>LMTK2</i> )       | 3,681           | 2,868              | 0.46 (C)                                | 1.08                          | 1.01, 1.16 | 0.02                   |
| rs2928679  | 8 ( <i>SLC25A37</i> )    | 3,692           | 2,828              | 0.44 (A)                                | 1.01                          | 0.94, 1.08 | 0.77                   |
| rs1512268  | 8 ( <i>NKX3.1</i> )      | 3,709           | 2,851              | 0.44 (T)                                | 1.08                          | 1.01, 1.16 | 0.03                   |
| rs1016343  | 8 (Unknown)              | 3,694           | 2,875              | 0.21 (T)                                | 1.17                          | 1.08, 1.27 | 2.01·10 <sup>-04</sup> |
| rs16901979 | 8 (Unknown)              | 3,655           | 2,852              | 0.03 (A)                                | 1.48                          | 1.23, 1.78 | 3.82·10 <sup>-05</sup> |
| rs16902094 | 8 (Unknown)              | 3,362           | 2,621              | 0.17 (G)                                | 1.12                          | 1.02, 1.23 | 0.02                   |
| rs620861   | 8 (Unknown)              | 3,460           | 2,673              | 0.37 (T)                                | 1.09                          | 1.02, 1.18 | 0.02                   |
| rs6983267  | 8 (Unknown)              | 3,670           | 2,847              | 0.49 (T)                                | 1.21                          | 1.13, 1.30 | 7.66·10 <sup>-08</sup> |
| rs4242382  | 8 (Unknown)              | 3,755           | 2,921              | 0.10 (A)                                | 1.45                          | 1.31, 1.62 | 8.15·10 <sup>-12</sup> |

|            |                           |       |       |          |      |            |                       |
|------------|---------------------------|-------|-------|----------|------|------------|-----------------------|
| rs1571801  | 9 ( <i>DAB2IP</i> )       | 3,598 | 2,773 | 0.25 (A) | 1.11 | 1.02, 1.20 | 0.012                 |
| rs10993994 | 10 ( <i>MSMB</i> )        | 3,653 | 2,852 | 0.39 (T) | 1.19 | 1.11, 1.27 | $1.75 \cdot 10^{-06}$ |
| rs7127900  | 11 (Unknown)              | 3,666 | 2,815 | 0.20 (A) | 1.18 | 1.08, 1.29 | $1.62 \cdot 10^{-04}$ |
| rs12418451 | 11 (Unknown)              | 3,773 | 2,932 | 0.30 (A) | 1.11 | 1.03, 1.20 | 0.005                 |
| rs10896449 | 11 (Unknown)              | 3,635 | 2,850 | 0.50 (A) | 1.20 | 1.12, 1.29 | $1.41 \cdot 10^{-07}$ |
| rs10875943 | 12 ( <i>TUBA1C/PRPH</i> ) | 2,363 | 1,867 | 0.31 (C) | 1.04 | 0.95, 1.14 | 0.433                 |
| rs902774   | 12 ( <i>KRT8</i> )        | 3,574 | 2,752 | 0.15 (A) | 1.09 | 0.99, 1.20 | 0.072                 |
| rs11649743 | 17 ( <i>HNF1B</i> )       | 3,661 | 2,858 | 0.20 (A) | 1.18 | 1.08, 1.29 | $3.51 \cdot 10^{-04}$ |
| rs4430796  | 17 ( <i>HNF1B</i> )       | 3,596 | 2,802 | 0.49 (G) | 1.25 | 1.17, 1.35 | $3.58 \cdot 10^{-10}$ |
| rs1859962  | 17 (Unknown)              | 3,701 | 2,882 | 0.48 (T) | 1.21 | 1.13, 1.30 | $3.38 \cdot 10^{-08}$ |
| rs8102476  | 19 (Unknown)              | 3,622 | 2,796 | 0.45 (T) | 1.01 | 0.94, 1.08 | 0.735                 |
| rs11672691 | 19 (Unknown)              | 3,338 | 2,549 | 0.26 (A) | 1.09 | 1.00, 1.19 | 0.04                  |
| rs2735839  | 19 ( <i>KLK2/KLK3</i> )   | 3,614 | 2,795 | 0.15 (A) | 1.14 | 1.03, 1.26 | 0.01                  |
| rs5759167  | 22 ( <i>BIL/TLL1</i> )    | 3,661 | 2,819 | 0.49 (T) | 1.15 | 1.08, 1.24 | $4.95 \cdot 10^{-05}$ |
| rs11704416 | 22 (TNRC6B)               | 3,354 | 2,564 | 0.20 (C) | 1.10 | 1.01, 1.20 | 0.034                 |
| rs5945619  | X ( <i>NUDT11</i> )       | 3,703 | 2,871 | 0.35 (C) | 1.11 | 1.05, 1.17 | $7.73 \cdot 10^{-05}$ |
| rs5919432  | X ( <i>AR</i> )           | 2,336 | 1,851 | 0.21 (G) | 1.06 | 0.99, 1.15 | 0.113                 |

Abbreviations: BPC3, Breast and Prostate Cancer Cohort Consortium; CI, confidence interval; GWAS, genome-wide association study; OR, odds ratio; SNP, single nucleotide polymorphism.

<sup>a</sup>From a logistic regression model adjusted for age at blood draw, cohort and country (within EPIC).

Web Table 3. Per Allele Association Between 46 GWAS-identified SNPs and Risk of Fatal Prostate Cancer in the BPC3.

| SNP        | Chromosome (gene)        | Number of cases | Number of controls | Minor allele frequency<br>(in controls) | Per allele OR <sup>a</sup> | 95% CI     | P-value |
|------------|--------------------------|-----------------|--------------------|-----------------------------------------|----------------------------|------------|---------|
| rs13385191 | 2 ( <i>C2orf43</i> )     | 419             | 2,556              | 0.24 (G)                                | 1.01                       | 0.85, 1.21 | 0.87    |
| rs1465618  | 2 ( <i>THADA</i> )       | 459             | 2,816              | 0.21 (T)                                | 1.14                       | 0.96, 1.35 | 0.14    |
| rs721048   | 2 ( <i>EHBPI</i> )       | 489             | 2,849              | 0.17 (A)                                | 1.06                       | 0.88, 1.27 | 0.53    |
| rs10187424 | 2 ( <i>GGCX/VAMP8</i> )  | 307             | 1,782              | 0.42 (G)                                | 1.16                       | 0.96, 1.40 | 0.13    |
| rs12621278 | 2 ( <i>ITGA6</i> )       | 475             | 2,834              | 0.05 (G)                                | 1.06                       | 0.76, 1.47 | 0.75    |
| rs2292884  | 2 ( <i>MLPH</i> )        | 403             | 2,455              | 0.24 (G)                                | 1.05                       | 0.88, 1.27 | 0.57    |
| rs2660753  | 3 (Unknown)              | 486             | 2,884              | 0.11 (T)                                | 0.96                       | 0.76, 1.21 | 0.71    |
| rs7629490  | 3 (Unknown)              | 400             | 2,441              | 0.33 (T)                                | 1.03                       | 0.88, 1.21 | 0.73    |
| rs6763931  | 3 ( <i>ZBTB38</i> )      | 321             | 1,837              | 0.43 (T)                                | 0.98                       | 0.82, 1.18 | 0.86    |
| rs10936632 | 3 ( <i>CLDN11/SKIL</i> ) | 315             | 1,858              | 0.50 (C)                                | 1.04                       | 0.86, 1.25 | 0.68    |
| rs17021918 | 4 ( <i>PDLIM5</i> )      | 469             | 2,831              | 0.34 (T)                                | 0.96                       | 0.82, 1.11 | 0.57    |
| rs7679673  | 4 ( <i>TET2</i> )        | 472             | 2,824              | 0.42 (A)                                | 1.25                       | 1.08, 1.45 | 0.002   |
| rs2242652  | 5 ( <i>TERT</i> )        | 324             | 1,858              | 0.21 (A)                                | 1.10                       | 0.88, 1.37 | 0.42    |
| rs12653946 | 5 ( <i>IRX4</i> )        | 420             | 2,548              | 0.44 (T)                                | 1.12                       | 0.96, 1.31 | 0.14    |
| rs2121875  | 5 ( <i>FGF10</i> )       | 309             | 1,739              | 0.33 (G)                                | 1.11                       | 0.91, 1.35 | 0.31    |
| rs130067   | 6 ( <i>CCHCR1</i> )      | 323             | 1,856              | 0.19 (G)                                | 0.89                       | 0.71, 1.12 | 0.33    |
| rs339331   | 6 ( <i>RFX6</i> )        | 421             | 2,564              | 0.28 (C)                                | 0.98                       | 0.83, 1.16 | 0.81    |
| rs9364554  | 6 ( <i>SLC22A3</i> )     | 489             | 2,876              | 0.27 (T)                                | 1.08                       | 0.92, 1.26 | 0.34    |
| rs12155172 | 7 ( <i>SP8</i> )         | 472             | 2,830              | 0.23 (A)                                | 1.05                       | 0.89, 1.25 | 0.54    |
| rs10486567 | 7 ( <i>JAZF1</i> )       | 500             | 2,873              | 0.24 (A)                                | 0.97                       | 0.83, 1.14 | 0.75    |
| rs6465657  | 7 ( <i>LMTK2</i> )       | 478             | 2,868              | 0.46 (C)                                | 0.98                       | 0.85, 1.13 | 0.81    |
| rs2928679  | 8 ( <i>SLC25A37</i> )    | 477             | 2,828              | 0.44 (A)                                | 1.00                       | 0.87, 1.16 | 0.99    |
| rs1512268  | 8 ( <i>NKX3.1</i> )      | 482             | 2,851              | 0.44 (T)                                | 0.99                       | 0.86, 1.15 | 0.94    |
| rs1016343  | 8 (Unknown)              | 487             | 2,875              | 0.21 (T)                                | 1.30                       | 1.10, 1.53 | 0.002   |
| rs16901979 | 8 (Unknown)              | 490             | 2,852              | 0.03 (A)                                | 1.46                       | 1.02, 2.08 | 0.039   |
| rs16902094 | 8 (Unknown)              | 450             | 2,621              | 0.17 (G)                                | 1.29                       | 1.07, 1.55 | 0.008   |
| rs620861   | 8 (Unknown)              | 463             | 2,673              | 0.37 (T)                                | 1.04                       | 0.89, 1.21 | 0.61    |
| rs6983267  | 8 (Unknown)              | 498             | 2,847              | 0.49 (T)                                | 1.23                       | 1.07, 1.41 | 0.004   |
| rs4242382  | 8 (Unknown)              | 505             | 2,921              | 0.10 (A)                                | 1.42                       | 1.17, 1.74 | 1.17    |

|            |                           |     |       |          |      |            |                        |
|------------|---------------------------|-----|-------|----------|------|------------|------------------------|
| rs1571801  | 9 ( <i>DAB2IP</i> )       | 482 | 2,773 | 0.25 (A) | 1.18 | 1.01, 1.39 | 0.038                  |
| rs10993994 | 10 ( <i>MSMB</i> )        | 494 | 2,852 | 0.39 (T) | 1.12 | 0.98, 1.30 | 0.11                   |
| rs7127900  | 11 (Unknown)              | 474 | 2,815 | 0.20 (A) | 1.07 | 0.90, 1.27 | 0.47                   |
| rs12418451 | 11 (Unknown)              | 504 | 2,932 | 0.30 (A) | 1.10 | 0.95, 1.29 | 0.20                   |
| rs10896449 | 11 (Unknown)              | 493 | 2,850 | 0.50 (A) | 1.12 | 0.97, 1.28 | 0.12                   |
| rs10875943 | 12 ( <i>TUBA1C/PRPH</i> ) | 321 | 1,867 | 0.31 (C) | 1.11 | 0.92, 1.34 | 0.26                   |
| rs902774   | 12 ( <i>KRT8</i> )        | 469 | 2,752 | 0.15 (A) | 1.21 | 1.00, 1.45 | 0.05                   |
| rs11649743 | 17 ( <i>HNF1B</i> )       | 496 | 2,858 | 0.20 (A) | 1.25 | 1.03, 1.50 | 0.02                   |
| rs4430796  | 17 ( <i>HNF1B</i> )       | 489 | 2,802 | 0.49 (G) | 1.36 | 1.17, 1.57 | 3.73·10 <sup>-05</sup> |
| rs1859962  | 17 (Unknown)              | 495 | 2,882 | 0.48 (T) | 1.20 | 1.04, 1.38 | 0.01                   |
| rs8102476  | 19 (Unknown)              | 495 | 2,796 | 0.45 (T) | 0.97 | 0.85, 1.12 | 0.71                   |
| rs11672691 | 19 (Unknown)              | 418 | 2,549 | 0.26 (A) | 1.24 | 1.03, 1.49 | 0.02                   |
| rs2735839  | 19 ( <i>KLK2/KLK3</i> )   | 483 | 2,795 | 0.15 (A) | 0.95 | 0.78, 1.17 | 0.65                   |
| rs5759167  | 22 ( <i>BIL/TLL1</i> )    | 471 | 2,819 | 0.49 (T) | 1.11 | 0.97, 1.28 | 0.13                   |
| rs11704416 | 22 (TNRC6B)               | 422 | 2,564 | 0.20 (C) | 1.24 | 1.04, 1.48 | 0.02                   |
| rs5945619  | X ( <i>NUDT11</i> )       | 490 | 2,871 | 0.35 (C) | 1.16 | 1.05, 1.29 | 0.003                  |
| rs5919432  | X ( <i>AR</i> )           | 320 | 1,851 | 0.21 (G) | 1.01 | 0.86, 1.18 | 0.92                   |

Abbreviations: BPC3, Breast and Prostate Cancer Cohort Consortium; CI, confidence interval; GWAS, genome-wide association study; OR, odds ratio; SNP, single nucleotide polymorphism.

<sup>a</sup>From a logistic regression model adjusted for age at blood draw, cohort and country (within EPIC).

Web Table 4. Association Between 25(OH)D Concentrations and Risk of Prostate Cancer in the BPC3.

|                       | Number of cases | Number of controls | Tertile of 25(OH)D concentrations |           |                 |            |                 |            | <i>P</i> -trend | <i>P</i> -heterogeneity (by cohort) <sup>b</sup> |
|-----------------------|-----------------|--------------------|-----------------------------------|-----------|-----------------|------------|-----------------|------------|-----------------|--------------------------------------------------|
|                       |                 |                    | First                             |           | Second          |            | Third           |            |                 |                                                  |
|                       |                 |                    | OR <sup>a</sup>                   | 95% CI    | OR <sup>a</sup> | 95% CI     | OR <sup>a</sup> | 95% CI     |                 |                                                  |
| Total prostate cancer | 3,811           | 2,980              | 1.00                              | Reference | 1.11            | 0.99, 1.25 | 1.16            | 1.03, 1.31 | 0.01            | 0.41                                             |
| Fatal prostate cancer | 511             | 2,980              | 1.00                              | Reference | 0.93            | 0.73, 1.19 | 0.96            | 0.75, 1.22 | 0.73            | 0.71                                             |

Abbreviations: 25(OH)D, 25-hydroxyvitamin D; BPC3, Breast and Prostate Cancer Cohort Consortium; CI, confidence interval; OR, odds ratio.

<sup>a</sup>From a logistic regression model across “cohort, batch and season-specific” tertiles of 25(OH)D concentrations adjusted for age at blood draw, year of blood draw, diabetes, body mass index, alcohol, cohort and country (within EPIC). The p-value for trend uses the ordinal (0, 1, 2) 25(OH)D variable.

<sup>b</sup>Likelihood ratio tests were used to evaluate heterogeneity between cohorts.

Web Table 5. Additive Scale Interactions Between 46 GWAS-identified SNPs and Risk of Total Prostate Cancer by 25(OH)D Concentrations in the BPC3.

| SNP        | Number of cases/controls | RERI <sup>a</sup>  | 95% CI <sup>a</sup>       | RERI <sup>b</sup>  | 95% CI <sup>b</sup> |
|------------|--------------------------|--------------------|---------------------------|--------------------|---------------------|
| rs13385191 | 3377/2556                | -0.017             | -0.165, 0.122             | -0.005             | -0.203, 0.006       |
| rs1465618  | 3648/2816                | -0.025             | -0.166, 0.129             | -0.003             | -0.018, 0.008       |
| rs721048   | 3675/2849                | 0.059              | -0.103, 0.189             | 0.003              | -0.010, 0.012       |
| rs10187424 | 2252/1782                | -0.059             | -0.324, 0.119             | -0.003             | -0.021, 0.012       |
| rs12621278 | 3682/2834                | 0.267 <sup>c</sup> | DNC <sup>c</sup>          | 0.021 <sup>c</sup> | DNC <sup>c</sup>    |
| rs2292884  | 3109/2455                | 0.004              | -0.157, 0.129             | -0.001             | -0.015, 0.009       |
| rs2660753  | 3692/2884                | 0.061              | -0.111, 0.225             | 0.007              | -0.007, 0.016       |
| rs7629490  | 3115/2441                | -0.018             | -0.205, 0.120             | -0.004             | -0.019, 0.007       |
| rs6763931  | 2318/1837                | 0.051              | -0.152, 0.174             | 0.005              | -0.009, 0.017       |
| rs10936632 | 2348/1858                | 0.161 <sup>d</sup> | 0.002, 0.288 <sup>d</sup> | 0.008              | -0.005, 0.020       |
| rs17021918 | 3656/2831                | 0.129              | -0.031, 0.290             | 0.009              | -0.006, 0.024       |
| rs7679673  | 3677/2824                | -0.022             | -0.217, 0.146             | -0.004             | -0.020, 0.009       |
| rs2242652  | 2350/1858                | 0.018              | -0.483, 0.299             | 0.001              | -0.030, 0.028       |
| rs12653946 | 3365/2548                | -0.074             | -0.260, 0.054             | -0.004             | -0.018, 0.007       |
| rs2121875  | 2285/1739                | 0.024              | -0.157, 0.159             | 0.005              | -0.007, 0.016       |
| rs130067   | 2340/1856                | -0.082             | -0.261, 0.101             | -0.010             | -0.032, 0.006       |
| rs339331   | 3387/2564                | -0.114             | -0.443, 0.107             | -0.009             | -0.031, 0.010       |
| rs9364554  | 3694/2876                | -0.011             | -0.115, 0.14              | 0.006              | -0.004, 0.013       |
| rs12155172 | 3650/2830                | 0.024              | -0.121, 0.142             | 0.001              | -0.011, 0.009       |
| rs10486567 | 3677/2873                | 0.131              | -0.161, 0.357             | 0.007              | -0.014, 0.029       |
| rs6465657  | 3681/2868                | -0.102             | -0.249, 0.051             | -0.005             | -0.018, 0.006       |
| rs2928679  | 3692/2828                | 0.024              | -0.120, 0.151             | 0.002              | -0.009, 0.012       |
| rs1512268  | 3709/2851                | -0.027             | -0.188, 0.103             | -0.004             | -0.018, 0.007       |
| rs1016343  | 3694/2875                | 0.004              | -0.146, 0.142             | -0.003             | -0.017, 0.008       |
| rs16901979 | 3655/2852                | 0.183              | -0.154, 0.484             | 0.015              | -0.005, 0.024       |
| rs16902094 | 3362/2621                | 0.056              | -0.087, 0.201             | 0.012              | -0.003, 0.018       |
| rs620861   | 3460/2673                | 0.179              | -0.023, 0.320             | 0.010              | -0.006, 0.024       |
| rs6983267  | 3670/2847                | 0.069              | -0.114, 0.210             | 0.002              | -0.013, 0.013       |
| rs4242382  | 3755/2921                | 0.133              | -0.083, 0.304             | 0.001              | -0.021, 0.014       |

|                                 |           |        |               |        |               |
|---------------------------------|-----------|--------|---------------|--------|---------------|
| rs1571801                       | 3598/2773 | -0.007 | -0.137, 0.137 | -0.002 | -0.015, 0.008 |
| rs10993994                      | 3653/2852 | 0.020  | -0.151, 0.131 | 0.0003 | -0.013, 0.010 |
| rs7127900                       | 3666/2815 | 0.089  | -0.026, 0.238 | 0.008  | -0.002, 0.015 |
| rs12418451                      | 3773/2932 | 0.017  | -0.140, 0.121 | -0.008 | -0.021, 0.003 |
| rs10896449                      | 3635/2850 | -0.059 | -0.242, 0.092 | -0.003 | -0.018, 0.009 |
| rs10875943                      | 2363/1867 | 0.015  | -0.135, 0.174 | 0.002  | -0.013, 0.118 |
| rs902774                        | 3574/2752 | -0.008 | -0.171, 0.138 | -0.004 | -0.020, 0.008 |
| rs11649743                      | 3661/2858 | -0.089 | -0.503, 0.290 | 0.003  | -0.026, 0.029 |
| rs4430796                       | 3596/2802 | -0.041 | -0.226, 0.134 | 0.003  | -0.013, 0.014 |
| rs1859962                       | 3701/2882 | -0.034 | -0.196, 0.121 | 0.003  | -0.011, 0.013 |
| rs8102476                       | 3622/2796 | 0.178  | -0.003, 0.289 | 0.011  | -0.001, 0.022 |
| rs11672691                      | 3338/2549 | -0.086 | -0.446, 0.209 | -0.011 | -0.037, 0.015 |
| rs2735839                       | 3614/2795 | -0.027 | -0.659, 0.353 | -0.006 | -0.043, 0.031 |
| rs5759167                       | 3661/2819 | 0.092  | -0.049, 0.232 | 0.009  | -0.003, 0.020 |
| rs11704416                      | 3354/2564 | -0.056 | -0.220, 0.084 | -0.006 | -0.023, 0.006 |
| rs5945619                       | 3703/2871 | -0.058 | -0.229, 0.087 | -0.007 | -0.024, 0.006 |
| rs5919432                       | 2336/1851 | 0.136  | -0.056, 0.295 | 0.010  | -0.005, 0.023 |
| Additive SNP score <sup>e</sup> | 3811/2980 | 0.017  | -0.046, 0.091 | 0.001  | -0.004, 0.009 |

Abbreviations: 25(OH)D, 25-hydroxyvitamin D; BPC3, Breast and Prostate Cancer Cohort Consortium; CI, confidence interval; GWAS, genome-wide association study; RERI, relative excess risk due to interaction; SNP, single nucleotide polymorphism.

<sup>a</sup>Relative excess risk due to interaction (RERIs) were calculated to infer about interactions at the additive scale for “cohort, batch and season-specific” tertiles of 25(OH)D and dichotomized SNP using logistic regression models adjusted for age at blood draw, year of blood draw, cohort and country (within EPIC). CIs were calculated using bootstrap.

<sup>b</sup>Relative excess risk due to interaction (RERIs) were calculated to infer about interactions at the additive scale for “Rosner-standardized” continuous 25(OH)D and dichotomized SNP using logistic regression models adjusted for age at blood draw, year of blood draw, cohort and country (within EPIC). CIs were calculated using bootstrap.

<sup>c</sup>Did not calculate CIs due to small sample size.

<sup>d</sup>P-value=0.027, which did not remain significant after adjustment for multiple testing.

<sup>e</sup>Relative excess risk due to interaction (RERIs) were calculated using a dichotomized (at the median among controls) additive genetic score (after summing the number of risk alleles across the 46 SNPs for each participant).

Web Table 6. Additive Scale Interactions Between 46 GWAS-identified SNPs and Risk of Fatal Prostate Cancer by 25(OH)D Concentrations in the BPC3.

| SNP        | Number of cases/controls | RERI <sup>a</sup>  | 95% CI <sup>a</sup>       | RERI <sup>b</sup>  | 95% CI <sup>b</sup>       |
|------------|--------------------------|--------------------|---------------------------|--------------------|---------------------------|
| rs13385191 | 419/2556                 | 0.011              | -0.287, 0.273             | -0.003             | -0.035, 0.017             |
| rs1465618  | 459/2816                 | -0.033             | -0.324, 0.294             | -0.006             | -0.054, 0.016             |
| rs721048   | 489/2849                 | 0.134              | -0.149, 0.385             | 0.010              | -0.016, 0.022             |
| rs10187424 | 307/1782                 | -0.059             | -0.768, 0.411             | 0.007              | -0.038, 0.042             |
| rs12621278 | 475/2834                 | 0.890 <sup>c</sup> | DNC <sup>c</sup>          | 0.213 <sup>c</sup> | DNC <sup>c</sup>          |
| rs2292884  | 403/2455                 | 0.015              | -0.297, 0.290             | 0.001              | -0.029, 0.019             |
| rs2660753  | 486/2884                 | 0.013              | -0.364, 0.271             | 0.012              | -0.014, 0.022             |
| rs7629490  | 400/2441                 | -0.008             | -0.376, 0.258             | -0.003             | -0.038, 0.016             |
| rs6763931  | 321/1837                 | 0.215              | -0.131, 0.420             | 0.015              | -0.007, 0.033             |
| rs10936632 | 315/1858                 | 0.130              | -0.210, 0.422             | 0.009              | -0.019, 0.036             |
| rs17021918 | 469/2831                 | -0.039             | -0.440, 0.344             | -0.001             | -0.038, 0.029             |
| rs7679673  | 472/2824                 | -0.054             | -0.529, 0.266             | -0.008             | -0.051, 0.025             |
| rs2242652  | 324/1858                 | -0.017             | -1.421, 0.572             | -0.032             | -0.166, 0.045             |
| rs12653946 | 420/2548                 | -0.095             | -0.513, 0.200             | -0.0001            | -0.033, 0.021             |
| rs2121875  | 309/1739                 | 0.123              | -0.274, 0.369             | 0.012              | -0.013, 0.028             |
| rs130067   | 323/1856                 | -0.097             | -0.557, 0.203             | -0.004             | -0.039, 0.015             |
| rs339331   | 421/2564                 | -0.170             | -0.925, 0.249             | -0.019             | -0.072, 0.023             |
| rs9364554  | 489/2876                 | -0.033             | -0.309, 0.255             | 0.002              | -0.025, 0.019             |
| rs12155172 | 472/2830                 | 0.065              | -0.202, 0.333             | 0.002              | -0.025, 0.019             |
| rs10486567 | 500/2873                 | 0.180              | -0.424, 0.508             | 0.003              | -0.041, 0.039             |
| rs6465657  | 478/2868                 | -0.236             | -0.705, 0.073             | -0.012             | -0.048, 0.010             |
| rs2928679  | 477/2828                 | 0.027              | -0.321, 0.266             | 0.008              | -0.018, 0.025             |
| rs1512268  | 482/2851                 | -0.187             | -0.538, 0.130             | -0.017             | -0.062, 0.007             |
| rs1016343  | 487/2875                 | 0.385              | -0.742, 0.052             | -0.028             | -0.098, 0.003             |
| rs16901979 | 490/2852                 | 0.271              | -0.362, 0.764             | 0.022              | -0.010, 0.032             |
| rs16902094 | 450/2621                 | 0.279 <sup>d</sup> | 0.032, 0.531 <sup>d</sup> | 0.026 <sup>e</sup> | 0.015, 0.038 <sup>e</sup> |
| rs620861   | 463/2673                 | 0.511 <sup>e</sup> | 0.247, 0.695 <sup>e</sup> | 0.047 <sup>d</sup> | 0.006, 0.090 <sup>d</sup> |
| rs6983267  | 498/2847                 | -0.054             | -0.492, 0.215             | -0.001             | -0.034, 0.021             |
| rs4242382  | 505/2921                 | 0.105              | -0.333, 0.369             | 0.009              | -0.034, 0.025             |

|                                 |          |                     |                             |                    |                            |
|---------------------------------|----------|---------------------|-----------------------------|--------------------|----------------------------|
| rs1571801                       | 482/2773 | -0.179              | -0.426, 0.181               | 0.001              | -0.030, 0.018              |
| rs10993994                      | 494/2852 | 0.186               | -0.097, 0.377               | 0.020 <sup>d</sup> | 0.0005, 0.037 <sup>d</sup> |
| rs7127900                       | 474/2815 | 0.013               | -0.251, 0.283               | 0.002              | -0.030, 0.019              |
| rs12418451                      | 504/2932 | 0.033               | -0.274, 0.281               | 0.001              | -0.028, 0.020              |
| rs10896449                      | 493/2850 | 0.025               | -0.302, 0.339               | 0.008              | -0.017, 0.030              |
| rs10875943                      | 321/1867 | -0.150              | -0.548, 0.184               | -0.006             | -0.049, 0.018              |
| rs902774                        | 469/2752 | 0.067               | -0.285, 0.365               | 0.004              | -0.033, 0.021              |
| rs11649743                      | 496/2858 | 0.287               | -1.079, 0.889               | 0.034              | -0.028, 0.110              |
| rs4430796                       | 489/2802 | -0.749 <sup>d</sup> | -1.655, -0.104 <sup>d</sup> | -0.018             | -0.076, 0.009              |
| rs1859962                       | 495/2882 | -0.083              | -0.583, 0.258               | 0.007              | -0.024, 0.031              |
| rs8102476                       | 495/2796 | 0.296               | -0.062, 0.423               | 0.022 <sup>d</sup> | 0.001, 0.045 <sup>d</sup>  |
| rs11672691                      | 418/2549 | -0.145              | -1.220, 0.399               | -0.001             | -0.070, 0.045              |
| rs2735839                       | 483/2795 | -0.031              | -2.208, 0.778               | 0.002              | -0.107, 0.113              |
| rs5759167                       | 471/2819 | 0.189               | -0.105, 0.422               | 0.022 <sup>d</sup> | 0.0002, 0.045 <sup>d</sup> |
| rs11704416                      | 422/2564 | -0.050              | -0.482, 0.246               | -0.003             | -0.047, 0.017              |
| rs5945619                       | 490/2871 | 0.041               | -0.342, 0.304               | -0.004             | -0.043, 0.017              |
| rs5919432                       | 320/1851 | 0.290               | -0.017, 0.567               | 0.025 <sup>d</sup> | 0.002, 0.051 <sup>d</sup>  |
| Additive SNP score <sup>f</sup> | 511/2980 | 0.164               | -0.039, 0.383               | 0.027 <sup>d</sup> | 0.001, 0.059 <sup>d</sup>  |

Abbreviations: 25(OH)D, 25-hydroxyvitamin D; BPC3, Breast and Prostate Cancer Cohort Consortium; CI, confidence interval; GWAS, genome-wide association study; RERI, relative excess risk due to interaction; SNP, single nucleotide polymorphism.

<sup>a</sup> Relative excess risk due to interaction (RERIs) were calculated to infer about interactions at the additive scale for “cohort, batch and season-specific” tertiles of 25(OH)D and dichotomized SNP using logistic regression models adjusted for age at blood draw, year of blood draw, cohort and country (within EPIC). CIs were calculated using bootstrap.

<sup>b</sup> Relative excess risk due to interaction (RERIs) were calculated to infer about interactions at the additive scale for “Rosner-standardized” continuous 25(OH)D and dichotomized SNP using logistic regression models adjusted for age at blood draw, year of blood draw, cohort and country (within EPIC). CIs were calculated using bootstrap.

<sup>c</sup> Did not calculate CIs due to small sample size.

<sup>d</sup> Unadjusted p-value between 0.01 and 0.05. All p-values were non-significant after allowance for multiple testing.

<sup>e</sup> Unadjusted p-value=0.00001, which remained significant after allowance for multiple testing.

<sup>f</sup> Relative excess risk due to interaction (RERIs) were calculated using a dichotomized (at the median among controls) additive genetic score (after summing the number of risk alleles across the 46 SNPs for each participant).

## REFERENCES

1. Albanes D, Mondul AM, Yu K, et al. Serum 25-hydroxy vitamin D and prostate cancer risk in a large nested case-control study. *Cancer epidemiology, biomarkers & prevention : a publication of the American Association for Cancer Research, cosponsored by the American Society of Preventive Oncology* 2011; **20**(9): 1850-1860.
2. Travis RC, Crowe FL, Allen NE, et al. Serum vitamin D and risk of prostate cancer in a case-control analysis nested within the European Prospective Investigation into Cancer and Nutrition (EPIC). *Am J Epidemiol* 2009; **169**(10): 1223-1232.
3. Shui IM, Mucci LA, Kraft P, et al. Vitamin D-related genetic variation, plasma vitamin D, and risk of lethal prostate cancer: a prospective nested case-control study. *J Natl Cancer Inst* 2012; **104**(9): 690-699.
4. Li H, Stampfer MJ, Hollis JB, et al. A prospective study of plasma vitamin D metabolites, vitamin D receptor polymorphisms, and prostate cancer. *PLoS Med* 2007; **4**(3): e103.
5. Ahn J, Albanes D, Berndt SI, et al. Vitamin D-related genes, serum vitamin D concentrations and prostate cancer risk. *Carcinogenesis* 2009; **30**(5): 769-776.
